# Supplementary material for: Iron Source Preference and Regulation of Iron Uptake in Cryptococcus neoformans
Source: PLOS journal article supplement (doi:10.1371/journal.ppat.0040045), 2008-02-11
Supplement: S2 (10.1371/journal.ppat.0040045.s002) [file journal.ppat.0040045.s002]

| Name | Sequence |
| --- | --- |
| TL2061 | GTGGTTGAAGAACATGCCGTGAGAA |
| TL2062 | AATTCCAGCACACTGGCGGCCGTTACTAGTGTCTGTCTTGGGTCAGGGATGTTAC |
| TL2063 | AATTCTGCAGATATCCATCACACTGGCGGCCTGAAGGCAAGAGTCCGGTACTGAC |
| TL2064 | AACTACAGTTTGTCGTCGCATCAGA |
| TL2065 | GAGAATGAAGGGATGTACCGACGG |
| TL2066 | GGCCATTGTCTTTAGTACGGAGGT |
| H9F1RCF | AAGGGTGAGCTCCTGCATCCCAGTTGTATACTGTAAGCTGAAC |
| H9F1RCR | AGTTTGACTAGTAAACTCCACTGTATATTGCTGGGGC |
| TL2071 | CTTCTTGTTGTTGACCTCGGGCATT |
| TL2072 | AATTCCAGCACACTGGCGGCCGTTACTAGTGCCGCTTCGACCGTCTCAC |
| TL2073 | AATTCTGCAGATATCCATCACACTGGCGGCTAATTTGGGAGTCATGCTACATTG |
| TL2074 | GGCGCGGTCATTCTGGATACTTT |
| TL2075 | GGCATTCTCTCGCAAAGG |
| TL2076 | CCGATTACCGTACATGGATCTC |
| H9F2RCFBglII | CTCAATCAGATCTCTCAGTGTTCGGGTCTAGCAATCGAC |
| H9F2RCRBglII | AAGCAAGAGATCTAAGAAGAGAGATATTGGCGGTGGCC |

**Table S2. Primers used for construction of mutant strains.**
